# Supplementary material for: The optimal time of starting adjuvant chemotherapy after curative surgery in patients with colorectal cancer
Source: PubMed Central journal article supplement (PMC10170689; doi:10.1186/s12885-023-10863-w), 2023-05-09
Supplement: 12885_2023_10863_MOESM1_ESM.pdf [file 12885_2023_10863_MOESM1_ESM.pdf]

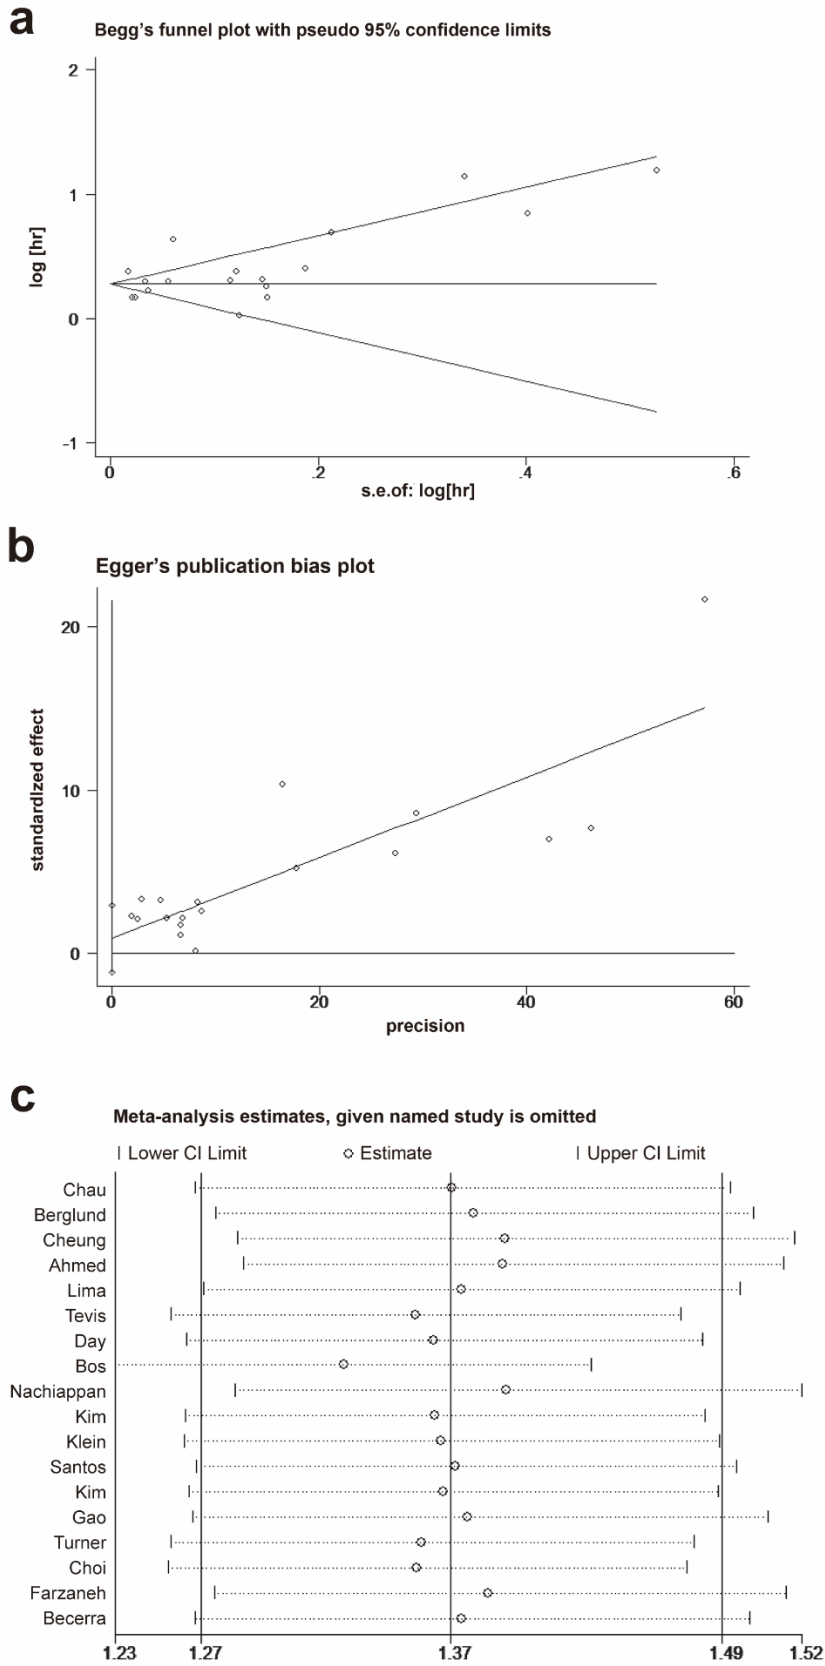

**Figure S1.** Test result for publication bias A. Begg's test ( $P = 0.13$ ); B. Egger's test ( $P = 0.36$ ); C. Sensitivity analysis of the hazard ratio of overall survival.

**Table S1.** The Newcastle-Ottawa scale quality of included studies.

| Study, year      | Selection |         |        |       | Comparability |    | Outcome/Exposure |          |         | Total |
|------------------|-----------|---------|--------|-------|---------------|----|------------------|----------|---------|-------|
|                  | REC/ICDA  | SNEC/RC | AE/SOC | DO/DC | SC            | AF | AO               | FU/SMACC | AFU/NRR |       |
| Chau, 2005       | 0         | 0       | 1      | 1     | 0             | 0  | 1                | 0        | 1       | 4     |
| Andre, 2007      | 0         | 0       | 1      | 1     | 0             | 0  | 1                | 1        | 0       | 4     |
| Berglund, 2008   | 0         | 0       | 1      | 1     | 1             | 1  | 0                | 1        | 0       | 5     |
| Owens, 2009      | 0         | 1       | 1      | 1     | 1             | 1  | 0                | 1        | 0       | 6     |
| Cheung, 2009     | 0         | 0       | 1      | 1     | 1             | 0  | 1                | 1        | 0       | 5     |
| Ahmed, 2010      | 1         | 1       | 1      | 1     | 1             | 0  | 0                | 1        | 1       | 7     |
| Bayraktar, 2011  | 1         | 1       | 1      | 1     | 1             | 1  | 1                | 1        | 0       | 8     |
| Czaykowski, 2011 | 1         | 1       | 1      | 1     | 0             | 1  | 1                | 1        | 0       | 7     |
| Lima, 2011       | 1         | 1       | 1      | 1     | 0             | 0  | 0                | 1        | 0       | 5     |
| Kang, 2013       | 1         | 1       | 1      | 1     | 0             | 1  | 0                | 1        | 0       | 6     |
| Tevis, 2013      | 1         | 1       | 1      | 1     | 1             | 1  | 0                | 1        | 0       | 7     |
| Yu, 2013         | 1         | 1       | 1      | 1     | 0             | 0  | 0                | 1        | 0       | 5     |
| Day, 2013        | 1         | 1       | 1      | 1     | 1             | 1  | 0                | 1        | 0       | 7     |
| Tsai, 2013       | 1         | 1       | 1      | 1     | 0             | 0  | 1                | 1        | 0       | 6     |
| Xu, 2014         | 0         | 1       | 1      | 1     | 0             | 1  | 0                | 1        | 0       | 5     |
| Bos, 2015        | 1         | 1       | 1      | 1     | 0             | 1  | 0                | 1        | 0       | 6     |
| Jeong, 2015      | 1         | 1       | 1      | 1     | 1             | 1  | 1                | 1        | 0       | 8     |
| Jeong, 2015      | 1         | 1       | 1      | 1     | 1             | 1  | 0                | 1        | 0       | 7     |
| Kim, 2015        | 1         | 1       | 1      | 1     | 1             | 0  | 0                | 1        | 0       | 6     |
| Klein, 2015      | 0         | 1       | 1      | 1     | 0             | 0  | 0                | 1        | 0       | 4     |
| Nachiappan, 2015 | 1         | 1       | 1      | 1     | 0             | 1  | 0                | 1        | 1       | 7     |
| Peixoto,2015     | 1         | 1       | 1      | 1     | 0             | 1  | 0                | 1        | 1       | 7     |
| Santos, 2016     | 1         | 1       | 1      | 1     | 1             | 1  | 0                | 1        | 0       | 7     |
| Sun, 2016        | 1         | 1       | 1      | 1     | 0             | 1  | 0                | 1        | 0       | 6     |
| Kim, 2017        | 1         | 1       | 1      | 1     | 0             | 1  | 1                | 1        | 0       | 7     |
| Becerra, 2017    | 1         | 1       | 1      | 1     | 0             | 1  | 1                | 1        | 0       | 7     |
| Gao, 2018        | 0         | 1       | 1      | 1     | 0             | 0  | 0                | 1        | 0       | 4     |
| Turner, 2018     | 1         | 1       | 1      | 1     | 0             | 0  | 0                | 1        | 0       | 5     |
| Choi, 2022       | 1         | 1       | 1      | 1     | 0             | 0  | 1                | 1        | 0       | 6     |
| Farzaneh, 2023   | 1         | 1       | 1      | 1     | 0             | 0  | 1                | 1        | 0       | 6     |

Abbreviations, AE: ascertainment of exposure; AF: study controls for any additional factors; AFU: adequacy of follow-up of cohorts; AO: assessment of outcome; DO: demonstration that outcome of interest was not present at start of study; FU: follow-up long enough (36 months) for outcomes to occur; ICDA: Is the case definition adequate; RC: Representativeness of the cases; REC: representativeness of the exposed cohort; SC: study controls for age, sex; “1” means that the study is satisfied the item and “0” means the opposite situation; SNEC: selection of the non-exposed cohort; SOC: Selection of controls; DC: Definition of controls; SMACC: Same method of ascertainment for cases and control; NRR: Non-Response rate.

**Table S2.** The summary results about 5-year overall survival in patients receiving AC in < 8 weeks and that in patients who started the AC in > 8 weeks.

| Author, Year     | Initiation of AC for < 8 weeks |        | Initiation of AC for > 8 weeks |        |
|------------------|--------------------------------|--------|--------------------------------|--------|
|                  | N                              | 5 y-OS | N                              | 5 y-OS |
| Chau, 2005       | /                              | 77%    | /                              | 72%    |
| Berglund, 2008   | 149                            | 57%    | 82                             | 52%    |
| Ahmed, 2010      | 422                            | 60%    | 241                            | 57%    |
| Cheung, 2009     | 4476                           | 60%    | 1583                           | 53%    |
| Lima, 2011       | 286                            | 71%    | 767                            | 52%    |
| Tevis, 2013      | 110                            | 86%    | 55                             | 61%    |
| Day, 2013        | 102                            | 90%    | 107                            | 74%    |
| Kim, 2015        | 566                            | 80%    | 31                             | 57%    |
| Klein, 2015      | 1539                           | 75%    | 288                            | 66%    |
| Bos, 2015        | 5618                           | 74%    | 1002                           | 60%    |
| Nachiappan, 2015 | 1549                           | 69%    | 1341                           | 64%    |
| Santos, 2016     | 606                            | 74%    | 712                            | 68%    |
| Becerra, 2017    | 730                            | 68%    | 403                            | 61%    |
| Gao, 2018        | 6911                           | 62%    | 2811                           | 53%    |
| Turner, 2018     | 38117                          | 73%    | 13133                          | 64%    |
| Choi, 2022       | 22655                          | 83%    | 1367                           | 70%    |
| Farzaneh, 2023   | 5526                           | 73%    | 3196                           | 66%    |

Abbreviations, 5y-OS: 5 years overall survival; AC: adjuvant chemotherapy; N: number of patients.

**Table S3.** The summary results about 5-year relapse-free survival in patients receiving AC in < 8 weeks and that in patients who started the AC in > 8 weeks.

| Author,Year  | Initiation of AC for < 8 weeks |         | Initiation of AC for > 8 weeks |         |
|--------------|--------------------------------|---------|--------------------------------|---------|
|              | N                              | 5 y-RFS | N                              | 5 y-RFS |
| Yu, 2013     | 58                             | 66%     | 44                             | 57%     |
| Kim, 2015    | 566                            | 71%     | 31                             | 40%     |
| Peixoto,2015 | 291                            | 71%     | 344                            | 72%     |

Abbreviations, 5y-RFS: 5 years relapse-free survival; AC: adjuvant chemotherapy; N: number of patients.

**Table S4.** The summary results about 5-year overall survival in patients receiving AC in  $\leq 4$  weeks and that in patients who started the AC in 5-8 weeks.

| Author,Year    | Initiation of AC for $\leq 4$ weeks |        | Initiation of AC for 5-8 weeks |        |
|----------------|-------------------------------------|--------|--------------------------------|--------|
|                | N                                   | 5 y-OS | N                              | 5 y-OS |
| Kang, 2013     | 126                                 | 71%    | 33                             | 55%    |
| Bos, 2015      | 1106                                | 75%    | 4512                           | 75%    |
| Klein, 2015    | 219                                 | 83%    | 1320                           | 80%    |
| Gao, 2018      | 746                                 | 62%    | 6165                           | 62%    |
| Farzaneh, 2023 | 905                                 | 71%    | 4621                           | 73%    |

Abbreviations, 5y-OS: 5 years overall survival; AC: adjuvant chemotherapy; N: number of patients.
